# Supplementary material
Source: PubMed Central journal article supplement (PMC3779722)
Supplement: supp_M113.479055_jbc.M113.479055-1.pdf [file supp_M113.479055_jbc.M113.479055-1.pdf]

## Supplemental Table S1

**Table S1. Statistical analysis of data from Figure 3 and Figure 5.** In each table, Student's *t*-test was performed for each pair at each enzyme concentration and the *p*-values are shown. Fisher's method was then used to calculate the combined probability for each pair. Briefly, Chi-square ( $X^2$ ) was determined by applying the formula:  $X^2 = -2 \sum_{i=1}^k \log_e(pi)$ , where *pi* is the *p*-value for the *i*<sup>th</sup> test and *k* is the number of tests. The combined *p*-values were determined from the  $X^2$  values, using 2*k* degrees of freedom. The difference in the mean is shown if the comparison is significantly different ( $p < 0.05$ ).

Table S1

**A**

| mNeil3 on Tg substrates in Figure 3B  |          |             |              |              |              |
|---------------------------------------|----------|-------------|--------------|--------------|--------------|
|                                       | [mNeil3] | qTel vs ssR | ssRSC vs ssR | dsTel vs dsR | dsRSC vs dsR |
| <i>p</i> values from <i>t</i> -test   | 1        | 0.154       | 0.031        | 0.003        | 0.075        |
|                                       | 10       | 0.053       | 0.001        | 0.010        | 0.034        |
|                                       | 100      | 0.159       | 0.006        | 0.010        | 0.010        |
|                                       | 500      | 0.225       | 0.031        | 0.005        | 0.001        |
| <i>p</i> value from Fisher's combined |          | 0.0386*     | <0.0001***   | <0.0001***   | <0.0001***   |
| Differences in mean                   | 1        | 6.557       | 20.580       | 3.500        | 4.140        |
|                                       | 10       | 14.840      | 39.560       | 11.587       | 19.150       |
|                                       | 100      | 9.447       | 32.460       | 26.870       | 44.013       |
|                                       | 500      | 8.970       | 17.587       | 39.940       | 55.023       |

**B**

| NEIL1 on Tg substrates in Figure 3C   |         |                           |              |
|---------------------------------------|---------|---------------------------|--------------|
|                                       | [NEIL1] | qTel vs ssR               | dsTel vs dsR |
| <i>p</i> values from <i>t</i> -test   | 1       | 0.805                     | 0.068        |
|                                       | 10      | 0.029                     | 0.146        |
|                                       | 100     | 0.354                     | 0.181        |
| <i>p</i> value from Fisher's combined |         | 0.14                      | 0.05         |
|                                       |         | No significant difference |              |

**C**

| mNeil3 on Gh substrates in Figure 5A  |          |              |
|---------------------------------------|----------|--------------|
|                                       | [mNeil3] | dsTel vs dsR |
| <i>p</i> values from <i>t</i> -test   | 1        | 0.064        |
|                                       | 10       | 0.007        |
|                                       | 100      | 0.001        |
| <i>p</i> values from Fishers combined |          | <0.0001***   |
| Differences in mean                   | 1        | -3.753       |
|                                       | 10       | -52.530      |
|                                       | 100      | -43.720      |

**D**

| NEIL1 on Gh substrates in Figure 5B   |         |              |
|---------------------------------------|---------|--------------|
|                                       | [NEIL1] | dsTel vs dsR |
| <i>p</i> values from <i>t</i> -test   | 1       | 0.104        |
|                                       | 10      | 0.001        |
|                                       | 100     | 0.929        |
| <i>p</i> value from Fisher's combined |         | 0.0038**     |
| Differences in mean                   | 1       | 2.618        |
|                                       | 10      | 19.670       |
|                                       | 100     | -0.140       |
